# Supplementary material for: Prevalence and factors associated with fatigue in the Lausanne middle-aged population: a population-based, cross-sectional survey
Source: PubMed Central journal article supplement — BMJ Open. 2019 Aug 24;9(8):e027070. doi: 10.1136/bmjopen-2018-027070 (PMC6720133; doi:10.1136/bmjopen-2018-027070), 2019-08-24
Supplement: bmjopen-2018-027070supp001.pdf [file bmjopen-2018-027070supp001.pdf]

|                                           |
|-------------------------------------------|
| <b>FATIGUE DURANT LA SEMAINE DERNIÈRE</b> |
|-------------------------------------------|

**Lisez chaque affirmation et entourez un nombre de 1 à 7 qui semble correspondre à votre état de fatigue durant la semaine dernière.**

- Une valeur basse (1) indique que vous n'êtes pas d'accord avec l'affirmation, tandis qu'une valeur haute (7) indique que vous êtes d'accord avec l'affirmation proposée.
- Il est important d'entourer un nombre (1 à 7) pour chaque question.

| Durant la semaine passée j'ai trouvé que...                                   | Pas d'accord ←————→ D'accord |   |   |   |   |   |   |
|-------------------------------------------------------------------------------|------------------------------|---|---|---|---|---|---|
|                                                                               | 1                            | 2 | 3 | 4 | 5 | 6 | 7 |
| Ma motivation est plus basse quand je suis fatigué (e)                        | 1                            | 2 | 3 | 4 | 5 | 6 | 7 |
| Les exercices entraînent une fatigue                                          | 1                            | 2 | 3 | 4 | 5 | 6 | 7 |
| Je suis facilement fatigué(e)                                                 | 1                            | 2 | 3 | 4 | 5 | 6 | 7 |
| La fatigue interfère avec mon fonctionnement physique                         | 1                            | 2 | 3 | 4 | 5 | 6 | 7 |
| La fatigue me cause souvent des problèmes                                     | 1                            | 2 | 3 | 4 | 5 | 6 | 7 |
| Ma fatigue empêche des activités physiques soutenues                          | 1                            | 2 | 3 | 4 | 5 | 6 | 7 |
| La fatigue m'empêche de mener à bien certaines obligations et responsabilités | 1                            | 2 | 3 | 4 | 5 | 6 | 7 |
| La fatigue est parmi mes 3 symptômes les plus handicapants                    | 1                            | 2 | 3 | 4 | 5 | 6 | 7 |
| La fatigue interfère avec mon travail, ma famille ou ma vie sociale           | 1                            | 2 | 3 | 4 | 5 | 6 | 7 |
