# Supplementary material for: Prevalence and factors associated with fatigue in the Lausanne middle-aged population: a population-based, cross-sectional survey
Source: PubMed Central journal article supplement — BMJ Open. 2019 Aug 24;9(8):e027070. doi: 10.1136/bmjopen-2018-027070 (PMC6720133; doi:10.1136/bmjopen-2018-027070), 2019-08-24
Supplement: bmjopen-2018-027070supp002.pdf [file bmjopen-2018-027070supp002.pdf]

|                                                                                     | <b>Scores</b>                                    |   |   |   |   |   |   |
|-------------------------------------------------------------------------------------|--------------------------------------------------|---|---|---|---|---|---|
|                                                                                     | <b>1 = Strongly Disagree; 7 = Strongly Agree</b> |   |   |   |   |   |   |
| <b>1. My motivation is lower when I am fatigued.</b>                                | 1                                                | 2 | 3 | 4 | 5 | 6 | 7 |
| <b>2. Exercise brings on my fatigue.</b>                                            | 1                                                | 2 | 3 | 4 | 5 | 6 | 7 |
| <b>3. I am easily fatigued.</b>                                                     | 1                                                | 2 | 3 | 4 | 5 | 6 | 7 |
| <b>4. Fatigue interferes with my physical functioning.</b>                          | 1                                                | 2 | 3 | 4 | 5 | 6 | 7 |
| <b>5. Fatigue causes frequent problems for me.</b>                                  | 1                                                | 2 | 3 | 4 | 5 | 6 | 7 |
| <b>6. My fatigue prevents sustained physical functioning.</b>                       | 1                                                | 2 | 3 | 4 | 5 | 6 | 7 |
| <b>7. Fatigue interferes with carrying out certain duties and responsibilities.</b> | 1                                                | 2 | 3 | 4 | 5 | 6 | 7 |
| <b>8. Fatigue is among my three most disabling symptoms.</b>                        | 1                                                | 2 | 3 | 4 | 5 | 6 | 7 |
| <b>9. Fatigue interferes with my work, family, or social life.</b>                  | 1                                                | 2 | 3 | 4 | 5 | 6 | 7 |
