# Supplementary material for: Prevalence and factors associated with fatigue in the Lausanne middle-aged population: a population-based, cross-sectional survey
Source: PubMed Central journal article supplement — BMJ Open. 2019 Aug 24;9(8):e027070. doi: 10.1136/bmjopen-2018-027070 (PMC6720133; doi:10.1136/bmjopen-2018-027070), 2019-08-24
Supplement: bmjopen-2018-027070supp003.pdf [file bmjopen-2018-027070supp003.pdf]

## Index de sévérité de l'insomnie (ISI)

### Instructions

Vos réponses doivent correspondre aux expériences que vous avez eues au cours des derniers mois. Répondez s'il vous plaît à toutes les questions.

#### Antécédents personnels de difficultés de sommeil :

1. Combien d'heures de sommeil dormez-vous lors d'une nuit habituelle? \_\_\_\_\_ heures
2. Considérez-vous que vous avez un problème de sommeil actuellement? OUI NON
3. Utilisez-vous actuellement des médicaments ou autres substances pour vous aider à dormir? OUI NON  
Si votre réponse est NON aux deux questions précédentes (n° 2 et 3), passez directement à la question n° 14.
4. Veuillez estimer la SÉVÉRITÉ actuelle (dernier mois) de vos difficultés de sommeil.
  - a. Difficultés d'endormissement :

| Aucune | Légère | Modérée | Sévère | Très sévère |
|--------|--------|---------|--------|-------------|
| 0      | 1      | 2       | 3      | 4           |

- b. Difficulté de maintien du sommeil:

| Aucune | Légère | Modérée | Sévère | Très sévère |
|--------|--------|---------|--------|-------------|
| 0      | 1      | 2       | 3      | 4           |

- c. Réveil trop précoce le matin :

| Aucune | Légère | Modérée | Sévère | Très sévère |
|--------|--------|---------|--------|-------------|
| 0      | 1      | 2       | 3      | 4           |

5. Êtes-vous actuellement SATISFAIT(E)/INSATISFAIT(E) de votre sommeil?

| Très Satisfait | Satisfait | Modérément Satisfait | Insatisfait | Très Insatisfait |
|----------------|-----------|----------------------|-------------|------------------|
| 0              | 1         | 2                    | 3           | 4                |

6. À quel point considérez-vous que vos difficultés de sommeil PERTURBENT votre fonctionnement quotidien (par exemple, fatigue, concentration, mémoire, humeur)?

| Aucunement | Légèrement | Moyennement | Beaucoup | Extrêmement |
|------------|------------|-------------|----------|-------------|
| 0          | 1          | 2           | 3        | 4           |

7. À quel point considérez-vous que vos difficultés de sommeil sont REMARQUÉES par les autres en termes de détérioration de votre qualité de vie?

Galland-Decker C, et al. BMJ Open 2019; 9:e027070. doi: 10.1136/bmjopen-2018-027070

| Aucunement | Légèrement | Moyennement | Beaucoup | Extrêmement |
|------------|------------|-------------|----------|-------------|
| 0          | 1          | 2           | 3        | 4           |

8. À quel point êtes-vous INQUIET(E)/PRÉOCCUPÉ(E) par vos difficultés actuelles de sommeil?

| Aucunement | Légèrement | Moyennement | Beaucoup | Extrêmement |
|------------|------------|-------------|----------|-------------|
| 0          | 1          | 2           | 3        | 4           |

## Annexes

9. Depuis combien de temps ressentez-vous des difficultés de sommeil?

En mois : \_\_\_\_\_ (nombre)  
En années : \_\_\_\_\_ (nombre)

10. Combien de nuits par semaine pensez-vous avoir des (nombre) difficultés de sommeil?

Par semaine \_\_\_\_\_ (nombre)

11. Avez-vous de la difficulté à rester éveillé le jour?

| Aucunement | Légèrement | Moyennement | Beaucoup | Extrêmement |
|------------|------------|-------------|----------|-------------|
| 0          | 1          | 2           | 3        | 4           |

12. Avez-vous d'autres difficultés de sommeil? Si oui, veuillez en préciser la nature :

\_\_\_\_\_ cauchemars, \_\_\_\_\_ difficultés à respirer, \_\_\_\_\_ ronflement, \_\_\_\_\_ parler dans votre sommeil, \_\_\_\_\_ marcher dans votre sommeil, \_\_\_\_\_ mouvements des membres inférieurs.

13. À quel âge, vos difficultés de sommeil ont-elles débuté? \_\_\_\_\_ ans

**Veillez passer à la question n° 15.**

14. **Histoire :**

Avez-vous eu dans le passé des difficultés de sommeil ayant persisté pour plus d'un mois?

OUI NON

**Si non, veuillez passer à la question n° 15.**

Si oui, pour quelle durée? \_\_\_\_\_ mois \_\_\_\_\_ années

Quel âge aviez-vous à ce moment? \_\_\_\_\_ ans

Quelle était la nature de ces difficultés? \_\_\_\_\_

(voir question n° 12).

15. Souffrez-vous actuellement d'un trouble anxieux ou dépressif?

16. Prenez-vous actuellement un traitement à visée psychologique?

## Score

Pour analyser et interpréter ce questionnaire, additionnez les notes données aux questions 4a, 4b, 4c, 5, 6, 7 et 8.

Le score total s'établit entre 0 et 28.

|       |                  |
|-------|------------------|
| 0-7   | Pas d'insomnie   |
| 8-14  | Insomnie légère  |
| 15-21 | Insomnie modérée |
| 22-28 | Insomnie sévère  |

## Référence

Bastien CH, Vallieres A, Morin CM. Validation of the Insomnia Severity Index as an outcome measure for insomnia research. *Sleep Med* 2001; 2 : 297-307.
