# Supplementary material for: Prevalence and factors associated with fatigue in the Lausanne middle-aged population: a population-based, cross-sectional survey
Source: PubMed Central journal article supplement — BMJ Open. 2019 Aug 24;9(8):e027070. doi: 10.1136/bmjopen-2018-027070 (PMC6720133; doi:10.1136/bmjopen-2018-027070), 2019-08-24
Supplement: bmjopen-2018-027070supp004.pdf [file bmjopen-2018-027070supp004.pdf]

Name: \_\_\_\_\_ Date: \_\_\_\_\_

1. Please rate the current (i.e., last 2 weeks) **SEVERITY** of your insomnia problem(s).

|                              | None | Mild | Moderate | Severe | Very |
|------------------------------|------|------|----------|--------|------|
| Difficulty falling asleep:   | 0    | 1    | 2        | 3      | 4    |
| Difficulty staying asleep:   | 0    | 1    | 2        | 3      | 4    |
| Problem waking up too early: | 0    | 1    | 2        | 3      | 4    |

2. How **SATISFIED**/dissatisfied are you with your current sleep pattern?

| Very Satisfied |   |   |   | Very Dissatisfied |
|----------------|---|---|---|-------------------|
| 0              | 1 | 2 | 3 | 4                 |

3. To what extent do you consider your sleep problem to **INTERFERE** with your daily functioning (e.g. daytime fatigue, ability to function at work/daily chores, concentration, memory, mood, etc.).

| Not at all<br>Interfering | A Little | Somewhat | Much | Very Much<br>Interfering |
|---------------------------|----------|----------|------|--------------------------|
| 0                         | 1        | 2        | 3    | 4                        |

4. How **NOTICEABLE** to others do you think your sleeping problem is in terms of impairing the quality of your life?

| Not at all<br>Noticeable | Barely | Somewhat | Much | Very Much<br>Noticeable |
|--------------------------|--------|----------|------|-------------------------|
| 0                        | 1      | 2        | 3    | 4                       |

5. How **WORRIED**/distressed are you about your current sleep problem?

| Not at all | A Little | Somewhat | Much | Very Much |
|------------|----------|----------|------|-----------|
| 0          | 1        | 2        | 3    | 4         |

### Guidelines for Scoring/Interpretation:

Add scores for all seven items (1a+1b+1c+ 2+3+4+5) = \_\_\_\_\_

Total score ranges from 0-28

0-7 = No clinically significant insomnia

8-14 = Subthreshold insomnia

15-21 = Clinical insomnia (moderate severity)

22-28 = Clinical insomnia (severe)
