# Supplementary material for: Prevalence and factors associated with fatigue in the Lausanne middle-aged population: a population-based, cross-sectional survey
Source: PubMed Central journal article supplement — BMJ Open. 2019 Aug 24;9(8):e027070. doi: 10.1136/bmjopen-2018-027070 (PMC6720133; doi:10.1136/bmjopen-2018-027070), 2019-08-24
Supplement: bmjopen-2018-027070supp005.pdf [file bmjopen-2018-027070supp005.pdf]

## Supplemental figure 1: The reasons for exclusion

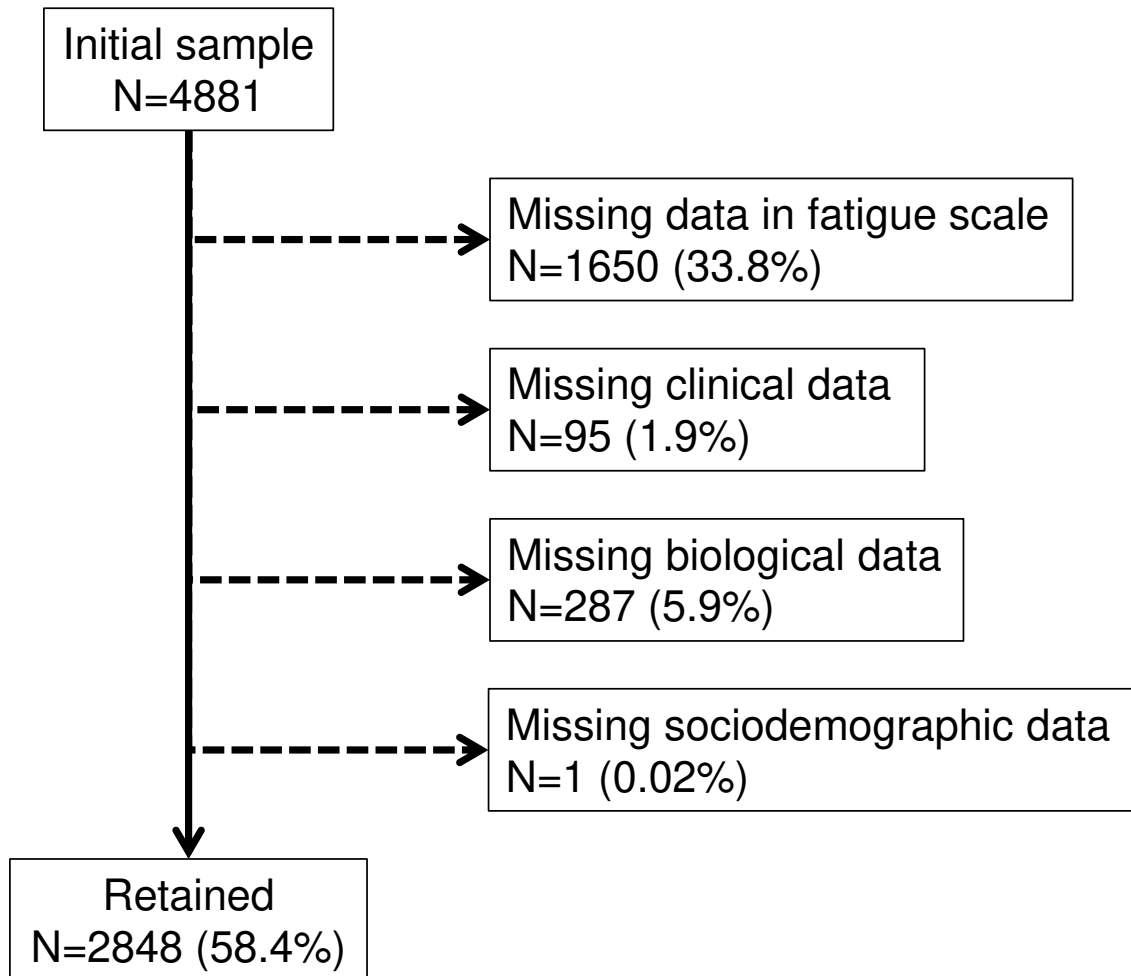

Exclusion if missing data in fatigue scale, missing clinical, biological and sociodemographic data
