# Supplementary material for: Prevalence and factors associated with fatigue in the Lausanne middle-aged population: a population-based, cross-sectional survey
Source: PubMed Central journal article supplement — BMJ Open. 2019 Aug 24;9(8):e027070. doi: 10.1136/bmjopen-2018-027070 (PMC6720133; doi:10.1136/bmjopen-2018-027070), 2019-08-24
Supplement: bmjopen-2018-027070supp006.pdf [file bmjopen-2018-027070supp006.pdf]

**Supplemental table 1:** comparison between excluded and included participants

|                          | Included         | Excluded         | p-value |
|--------------------------|------------------|------------------|---------|
| N                        | 2848             | 2033             |         |
| Woman (%)                | 1514 (53.2)      | 1175 (57.8)      | 0.001   |
| Age (years)              | 61.5 ± 9.8       | 65.0 ± 11.0      | <0.001  |
| Age groups               |                  |                  | <0.001  |
| 45-54                    | 879 (30.9)       | 467 (23.0)       |         |
| 55-64                    | 933 (32.8)       | 569 (28.0)       |         |
| 64-74                    | 739 (26.0)       | 560 (27.6)       |         |
| 75+                      | 297 (10.4)       | 437 (21.5)       |         |
| Educational level        |                  |                  | <0.001  |
| University               | 683 (24.0)       | 348 (17.2)       |         |
| High school              | 808 (28.4)       | 450 (22.2)       |         |
| Apprenticeship           | 1015 (35.6)      | 734 (36.2)       |         |
| Primary                  | 342 (12.0)       | 497 (24.5)       |         |
| Smoking categories       |                  |                  | 0.015   |
| Never                    | 1149 (41.3)      | 737 (43.1)       |         |
| Former                   | 1130 (40.6)      | 624 (36.5)       |         |
| Current                  | 505 (18.1)       | 350 (20.5)       |         |
| BMI (kg/m <sup>2</sup> ) | 26.4 ± 4.5       | 26.5 ± 5.0       | 0.525   |
| BMI categories           |                  |                  | 0.038   |
| Underweight              | 42 (1.5)         | 33 (2.0)         |         |
| Normal                   | 1139 (40.0)      | 643 (39.4)       |         |
| Overweight               | 1157 (40.6)      | 618 (37.8)       |         |
| Obese                    | 510 (17.9)       | 339 (20.8)       |         |
| Caffeinated drinks       |                  |                  | <0.001  |
| None                     | 280 (10.1)       | 182 (11.3)       |         |
| 1-3/day                  | 1792 (64.7)      | 1108 (69.0)      |         |
| 4-6/day                  | 608 (21.9)       | 272 (16.9)       |         |
| 7+/day                   | 92 (3.3)         | 44 (2.7)         |         |
| Self-rated health        |                  |                  | <0.001  |
| Very good                | 679 (23.8)       | 353 (17.8)       |         |
| Good                     | 1617 (56.8)      | 1094 (55.2)      |         |
| Average                  | 502 (17.6)       | 464 (23.4)       |         |
| Bad + Very bad           | 50 (1.8)         | 72 (3.6)         |         |
| Cardiovascular disease   | 245 (8.6)        | 274 (13.5)       | <0.001  |
| Diabetes                 | 226 (8.0)        | 256 (15.0)       | <0.001  |
| Depression               | 329 (11.9)       | 93 (11.9)        | 0.971   |
| Anemia                   | 109 (3.8)        | 108 (6.5)        | <0.001  |
| Ferritin [mcg/l]         | 227 [147 - 2.97] | 220 [141 - 2.93] | 0.058   |
| TSH [mU/l]               | 3.0 [2.1 - 3.0]  | 3.0 [2.1 - 2.9]  | 0.375   |
| Free T4 [pmol/l]         | 16.2 ± 2.5       | 16.2 ± 3.3       | 0.534   |
| Anti-hypertensive drugs  | 885 (31.1)       | 812 (39.9)       | <0.001  |
| Anti-histaminics         | 68 (2.4)         | 32 (1.6)         | 0.048   |
| Antidepressants          | 278 (9.8)        | 246 (12.1)       | 0.009   |
| Hypnotics                | 122 (4.3)        | 145 (7.1)        | <0.001  |

BMI, body mass index. Results are expressed as number of participants (column percentage) for categorical variables and as average ± standard deviation or median [interquartile range] for continuous variables. Between-group comparison performed using chi-square for categorical variables and using student's t-test or Kruskal-Wallis test (§) for continuous variables.
