# Supplementary material for: Prevalence and factors associated with fatigue in the Lausanne middle-aged population: a population-based, cross-sectional survey
Source: PubMed Central journal article supplement — BMJ Open. 2019 Aug 24;9(8):e027070. doi: 10.1136/bmjopen-2018-027070 (PMC6720133; doi:10.1136/bmjopen-2018-027070), 2019-08-24
Supplement: bmjopen-2018-027070supp007.pdf [file bmjopen-2018-027070supp007.pdf]

**Supplemental table 2:** variables used to compute the propensity score

|                        | Odds ratio (95% CI) | p-value |
|------------------------|---------------------|---------|
| Gender (woman vs. man) | 0.77 (0.64 - 0.93)  | 0.006   |
| Age groups             |                     |         |
| 45-54                  | 1 (ref)             |         |
| 55-64                  | 0.85 (0.68 - 1.07)  | 0.178   |
| 64-74                  | 0.81 (0.63 - 1.03)  | 0.083   |
| 75+                    | 0.50 (0.37 - 0.67)  | <0.001  |
| Educational level      |                     |         |
| Primary                | 1 (ref)             |         |
| Apprenticeship         | 1.45 (1.11 - 1.91)  | 0.007   |
| High school            | 1.58 (1.19 - 2.10)  | 0.002   |
| University             | 1.51 (1.12 - 2.04)  | 0.007   |
| Smoking categories     |                     |         |
| Never                  | 1 (ref)             |         |
| Former                 | 1.15 (0.95 - 1.39)  | 0.155   |
| Current                | 1.08 (0.85 - 1.39)  | 0.523   |
| BMI categories         |                     |         |
| Underweight            | 0.80 (0.43 - 1.49)  | 0.479   |
| Normal                 | 1 (ref)             |         |
| Overweight             | 1.39 (1.14 - 1.69)  | 0.001   |
| Obese                  | 1.57 (1.20 - 2.05)  | 0.001   |
| Caffeinated drinks     |                     |         |
| None                   |                     |         |
| 1-3/day                | 1.14 (0.86 - 1.51)  | 0.369   |
| 4-6/day                | 1.29 (0.93 - 1.78)  | 0.129   |
| 7+/day                 | 1.16 (0.66 - 2.03)  | 0.599   |
| Self-rated health      |                     |         |
| Very good              | 1 (ref)             |         |
| Good                   | 0.98 (0.79 - 1.21)  | 0.836   |
| Average                | 1.08 (0.80 - 1.45)  | 0.610   |
| Bad + Very bad         | 1.22 (0.55 - 2.73)  | 0.621   |
| Diabetes (yes vs. no)  | 0.69 (0.50 - 0.94)  | 0.021   |
| Anemia (yes vs. no)    | 0.82 (0.54 - 1.26)  | 0.369   |

BMI, body mass index. Results are expressed as multivariable-adjusted odds ratio (95% confidence interval). Multivariable analysis performed using logistic regression.
