# Supplementary material for: Prevalence and factors associated with fatigue in the Lausanne middle-aged population: a population-based, cross-sectional survey
Source: PubMed Central journal article supplement — BMJ Open. 2019 Aug 24;9(8):e027070. doi: 10.1136/bmjopen-2018-027070 (PMC6720133; doi:10.1136/bmjopen-2018-027070), 2019-08-24
Supplement: bmjopen-2018-027070supp009.pdf [file bmjopen-2018-027070supp009.pdf]

**Supplemental table 3:** Bivariate and multivariable analysis of the continuous determinants of fatigue as defined by a Fatigue Severity Scale  $\geq 5$  in the Cohorte Lausannoise (CoLaus) study, Lausanne, Switzerland, 2014-2017.

|                          | Bivariate       |                 |         | Multivariable   |                  |         |
|--------------------------|-----------------|-----------------|---------|-----------------|------------------|---------|
|                          | No fatigue      | Fatigue         | p-value | No fatigue      | Fatigue          | p-value |
| <b>N</b>                 | 2538            | 310             |         | 2538            | 310              |         |
| Age (years)              | 61.7 $\pm$ 9.8  | 60.0 $\pm$ 10.0 | 0.005   |                 |                  |         |
| BMI (kg/m <sup>2</sup> ) | 26.2 $\pm$ 4.4  | 27.8 $\pm$ 5.4  | <0.001  |                 |                  |         |
| Handgrip (kg)            | 35.0 $\pm$ 12.0 | 32.8 $\pm$ 11.4 | 0.002   | 35.1 $\pm$ 0.1  | 35.4 $\pm$ 0.5   | 0.453   |
| Ferritin [mcg/l]         | 149 [91 - 229]  | 138 [84 - 208]  | 0.083 § | 185.1 $\pm$ 3.5 | 205.1 $\pm$ 11.3 | 0.098   |
| TSH [mIU/l]              | 2.1 [1.5 - 3.0] | 2.1 [1.5 - 3.0] | 1.000 § | 2.5 $\pm$ 0.1   | 2.5 $\pm$ 0.1    | 0.987   |
| Free T4 [pmol/l]         | 16.2 $\pm$ 2.5  | 16.2 $\pm$ 2.6  | 0.968   | 16.3 $\pm$ 0.1  | 16.2 $\pm$ 0.2   | 0.881   |

BMI, body mass index; TSH, thyroid stimulating hormone. Results are expressed as average  $\pm$  standard deviation or as median [interquartile range] for the bivariate analysis and as multivariable-adjusted average  $\pm$  standard error for the multivariable analysis. Bivariate analysis performed using student's t-test or Kruskal-Wallis nonparametric test (§). Multivariable analysis conducted using analysis of variance adjusting for gender, age group, BMI categories, insomnia categories, educational level, diabetes, presence of antihistaminic, antidepressive or hypnotic drugs, self-rated health and depression.
