# Supplementary material for: Prevalence and factors associated with fatigue in the Lausanne middle-aged population: a population-based, cross-sectional survey
Source: PubMed Central journal article supplement — BMJ Open. 2019 Aug 24;9(8):e027070. doi: 10.1136/bmjopen-2018-027070 (PMC6720133; doi:10.1136/bmjopen-2018-027070), 2019-08-24
Supplement: bmjopen-2018-027070supp011.pdf [file bmjopen-2018-027070supp011.pdf]

**Supplemental table 5:** Multivariable analysis of the categorical determinants of fatigue (defined as a fatigue severity score  $\geq 4$ ) in the Cohorte Lausannoise (CoLaus) study, Lausanne, Switzerland, 2014-2017, using inverse probability weighting.

|                                | OR (95% CI)        | P-value |
|--------------------------------|--------------------|---------|
| Gender (woman vs. man)         | 1.26 (0.99 - 1.61) | 0.064   |
| Age group                      |                    |         |
| 45-54                          | 1 (ref)            |         |
| 55-64                          | 0.70 (0.53 - 0.91) | 0.009   |
| 64-74                          | 0.43 (0.31 - 0.59) | <0.001  |
| 75+                            | 0.64 (0.42 - 0.96) | 0.031   |
| Educational level              |                    |         |
| Primary                        | 1 (ref)            |         |
| Apprenticeship                 | 1.02 (0.70 - 1.48) | 0.923   |
| High school                    | 1.08 (0.74 - 1.59) | 0.678   |
| University                     | 0.94 (0.63 - 1.41) | 0.768   |
| BMI categories                 |                    |         |
| Underweight                    | 0.71 (0.20 - 2.56) | 0.598   |
| Normal                         | 1 (ref)            |         |
| Overweight                     | 1.03 (0.79 - 1.34) | 0.833   |
| Obese                          | 1.44 (1.05 - 1.98) | 0.022   |
| Insomnia categories            |                    |         |
| No insomnia                    | 1 (ref)            |         |
| Subthreshold                   | 1.57 (1.15 - 2.14) | 0.004   |
| Clinical insomnia              | 3.74 (2.29 - 6.10) | <0.001  |
| Self-rated health              |                    |         |
| Very good                      | 1 (ref)            |         |
| Good                           | 1.92 (1.37 - 2.69) | <0.001  |
| Average                        | 5.51 (3.71 - 8.17) | <0.001  |
| Bad + Very bad                 | 17.2 (7.51 - 39.3) | <0.001  |
| Diabetes (yes vs. no)          | 1.15 (0.76 - 1.74) | 0.501   |
| Depression (CES-D, yes vs. no) | 3.21 (2.34 - 4.42) | <0.001  |
| Anemia (yes vs. no)            | 1.58 (0.91 - 2.76) | 0.107   |
| TSH categories                 |                    |         |
| High > 4.22                    | 1.15 (0.77 - 1.70) | 0.499   |
| Normal 0.27-4.22               | 1 (ref)            |         |
| Low < 0.27                     | 3.30 (1.09 - 10.0) | 0.035   |
| Anti-histaminics (yes vs. no)  | 1.33 (0.69 - 2.57) | 0.398   |
| Antidepressants (yes vs. no)   | 1.39 (0.98 - 1.97) | 0.069   |
| Hypnotics (yes vs. no)         | 0.59 (0.31 - 1.10) | 0.098   |

ref, reference. Results are expressed as multivariable-adjusted odds ratio (OR) and (95% confidence interval - CI). Multivariable analysis performed using logistic regression with inverse probability weighting.
